# Supplementary material for: Functional Characterization of Two RNA Methyltransferase Genes METTL3 and METTL14 Uncovers the Roles of m6A in Mediating Adaptation of Plutella xylostella to Host Plants
Source: MDPI journal article supplement (doi:10.3390/ijms231710013), 2022-09-02
Supplement: s1 [file s1]

## Supplementary Materials

**Table S1.** The primers used in this study.

| Primer Name       | Sequence (5'-3')                              | Purpose           |
|-------------------|-----------------------------------------------|-------------------|
| METTL3-F          | GTGTTAATGTATCCTTCAAGTTTC                      | ORF amplification |
| METTL3-R          | GAAATCTATTTATTGACGTCGATAC                     | ORF amplification |
| METTL3-3'RACE-1F  | CCTTCAAGAAGCGCTACCCCGACGGC                    | ORF amplification |
| METTL3-3'RACE-2F  | GCCCATTTATCGACGTAAATAAATAGATT                 | ORF amplification |
| METTL3-5'RACE-1R  | GGCGAACTTGTGCAGCGCGCTGGTGACG                  | ORF amplification |
| METTL3-5'RACE-2R  | GGGCACTGTCGGCTTCTCTGTCTTTT                    | ORF amplification |
| ME14-1F           | GAAGAACTGCTCGCGCAAA                           | ORF amplification |
| ME14-1R           | ACAGGAACACGAAGGCTCTG                          | ORF amplification |
| ME14-2F           | CCGCAGAACTTCATCCGAGA                          | ORF amplification |
| ME14-2R           | GCGTAGAGAGAGGCGTTGAA                          | ORF amplification |
| METTL14-3'RACE-1F | GGGACGGAGAAGAATCCACCTGTTTCGG                  | ORF amplification |
| METTL14-3'RACE-2F | GGCTTCCGGCGCTGCGAGGACATCTG                    | ORF amplification |
| METTL14-5'RACE-1R | CCCTTCAAGAACGTAGAAGAGTCGGTG                   | ORF amplification |
| METTL14-5'RACE-2R | GGCTCCACGAGCAGCACGTCGAAC                      | ORF amplification |
| sgRNA-METTL3      | TAATACGACTCACTATAGGCGAACTTGTGCAGCGCGC         | sgRNA synthesis   |
|                   | GTTTTAGAGCTAGAAATAGCAAGTTAAAATAAGGCTA<br>GTCC |                   |
| sgRNA-METTL14-1   | TAATACGACTCACTATAGGCCCGTGTCCACAAAGTGC         | sgRNA synthesis   |
|                   | GTTTTAGAGCTAGAAATAGCAAGTTAAAATAAGGCTA<br>GTCC |                   |
| sgRNA-METTL14-4   | TAATACGACTCACTATAGGATGATCTGATCGCTGAGA         | sgRNA synthesis   |
|                   | GTTTTAGAGCTAGAAATAGCAAGTTAAAATAAGGCTA<br>GTCC |                   |
| METTL3-test-F     | GTCCTCTATTTCCCTCCCTGTAG                       | Deletion test     |
| METTL3-test-R     | CAATAACATTTCACAGCCACC                         | Deletion test     |
| METTL14-test-F    | GCCCCAAAACATCTCTGCAC                          | Deletion test     |
| METTL14-test-R    | CCTTCAGATCACACTTCAAGTAC                       | Deletion test     |
| qpcr-ME3-AS1-1F   | ACAGCCTTCGAGAGAAGTTGG                         | qRT-PCR           |
| qpcr-ME3-AS1-1R   | CCCCTTGTCATGTCTACTGCT                         | qRT-PCR           |
| qpcr-ME3-AS2-1F   | CGTAGTTTCGGTCGTGCCTC                          | qRT-PCR           |
| qpcr-ME3-AS2-1R   | GCTAGCAGACAGGATCAACCA                         | qRT-PCR           |
| ME14-qPCR-1F      | ACGTTCTTGAAGGGCACACA                          | qRT-PCR           |
| ME14-qPCR-1R      | GTACATAGGTGGAGTGGCCG                          | qRT-PCR           |
